# Supplementary material for: Differential adhesion regulates neurite placement via a retrograde zippering mechanism
Source: eLife. 2021 Nov 16;10:e71171. doi: 10.7554/eLife.71171 (PMC8843091; doi:10.7554/eLife.71171)
Supplement: Figure 1—figure supplement 2—source data 1. [file elife-71171-fig1-figsupp2-data1.xlsx]

## Sheet: Sheet1
Figure 1-figure supplement 2I
Matrix of cosine similarity values (AIBR contacts)
	Adult_45 hr	Adult_N2U	L4_JSH	L1_16hr	L1_8hr	L1_0hr	L1_5hr	L2_23hr	L3_27hr
Adult_45 hr	1	0.953618	0.943808	0.941167	0.813371	0.840734	0.897242	0.921377	0.937872
Adult_N2U	0.953618	1	0.968511	0.89299	0.853227	0.898865	0.889612	0.923632	0.942387
L4_JSH	0.943808	0.968511	1	0.903352	0.879841	0.906369	0.903586	0.948334	0.957671
L1_16hr	0.941167	0.89299	0.903352	1	0.756611	0.786642	0.858362	0.866411	0.898407
L1_8hr	0.813371	0.853227	0.879841	0.756611	1	0.861097	0.869638	0.870889	0.887669
L1_0hr	0.840734	0.898865	0.906369	0.786642	0.861097	1	0.887036	0.864098	0.898461
L1_5hr	0.897242	0.889612	0.903586	0.858362	0.869638	0.887036	1	0.857617	0.928995
L2_23hr	0.921377	0.923632	0.948334	0.866411	0.870889	0.864098	0.857617	1	0.927635
L3_27hr	0.937872	0.942387	0.957671	0.898407	0.887669	0.898461	0.928995	0.927635	1
