# Supplementary material for: Differential adhesion regulates neurite placement via a retrograde zippering mechanism
Source: eLife. 2021 Nov 16;10:e71171. doi: 10.7554/eLife.71171 (PMC8843091; doi:10.7554/eLife.71171)
Supplement: Figure 1—figure supplement 2—source data 2. [file elife-71171-fig1-figsupp2-data2.xlsx]

## Sheet: Sheet1
Figure 1-figure supplement 2J
Betweenness centrality values
Adult_45 hr			L1_5 hr
Neuron	Betweenness centrality		Neuron	Betweenness centrality
AIBL	0.0346062		AIBR	0.0523976
SIBVR	0.0335533		AIBL	0.043091
AIBR	0.0307797		ALA	0.0362701
ALA	0.0294572		DVA	0.02534
SIBDR	0.0233827		AINR	0.0251085
DVA	0.0223502		AINL	0.024717
AVBR	0.0218485		SIBVR	0.0239953
ADAL	0.0214228		SIBDL	0.023829
AVBL	0.0213681		SIBDR	0.0234802
RICL	0.0212037		AVDL	0.0222741
RIH	0.0203055		AVAL	0.0220377
SIBDL	0.0196737		ADAL	0.0213598
AVER	0.0195573		RICR	0.0212329
AVAR	0.0187487		AVDR	0.0207926
SIBVL	0.018522		SIBVL	0.0205569
AVEL	0.0181008		ADAR	0.0202585
RICR	0.0180863		URXL	0.0187913
AVDR	0.017858		PVR	0.0187361
SMBVR	0.0170407		URYDR	0.018566
RMGR	0.0170081		ADLL	0.0184417
RMFL	0.0167066		AVEL	0.0183101
AVHR	0.0162069		RICL	0.0176701
AVDL	0.0155464		RIH	0.0171546
RMGL	0.015396		AVER	0.0167633
AVJL	0.0151775		URXR	0.0165692
SIAVL	0.0145489		CEPVR	0.0163171
AVAL	0.014494		CEPVL	0.016204
OLLL	0.0144434		AVBR	0.0161493
RIS	0.0144192		SMBVR	0.0158613
AVFL	0.0134685		RMEV	0.0156469
RIVR	0.0134375		AVAR	0.0153905
ADAR	0.0134202		ADLR	0.0148562
AVHL	0.0129576		RIBL	0.0143449
RIML	0.0127614		URYDL	0.014144
CEPVR	0.0126867		AVJL	0.014135
RID	0.0126637		SMBVL	0.0141329
CEPVL	0.0124367		RIVR	0.0139969
RIAR	0.0122695		BAGL	0.0139271
RMEV	0.0122571		RIAL	0.0138812
RMHL	0.0118184		SIADR	0.0137565
RMFR	0.0117959		AWCL	0.013708
SMBVL	0.0116423		SIADL	0.0136503
SMBDR	0.0115941		ASER	0.0135654
RIMR	0.0113485		OLLR	0.0131988
AVJR	0.0113103		RMGL	0.0130524
AVFR	0.0110503		RMGR	0.01271
RIAL	0.0108849		AWCR	0.0127002
OLLR	0.0107813		AVHL	0.0121762
AINR	0.0104276		OLQDR	0.0120549
HSNL	0.0103973		OLLL	0.011845
AINL	0.0102084		RIBR	0.0117775
BAGL	0.00999365		IL1DR	0.0117263
SIADL	0.00990081		AVHR	0.0116696
AIYL	0.00986419		DVC	0.0116639
SIAVR	0.00938721		IL2DL	0.0107254
ASER	0.00933381		BAGR	0.0104609
ADER	0.00919923		AVBL	0.0104433
AIZR	0.00905301		SMBDR	0.0101722
RIVL	0.00902892		IL1DL	0.00988395
RMHR	0.00901778		RIAR	0.00978312
AIZL	0.00896918		RMDDL	0.00959684
RMDVR	0.00886464		URYVR	0.00955693
AWCL	0.00885716		AIZL	0.00932849
URYDR	0.00882774		IL2L	0.00916146
IL1DR	0.00878574		URYVL	0.00911538
PVR	0.0086361		RIR	0.00910277
RIGL	0.00861882		ASEL	0.0090838
URXR	0.00858531		SMBDL	0.00903462
IL1DL	0.00850238		RIVL	0.0087379
SAAVR	0.00841906		SMDDR	0.00855651
IL2R	0.00839814		RMED	0.00846112
RIBR	0.00820797		AVJR	0.0084497
AIML	0.00804397		RIGL	0.0083202
URXL	0.00792906		OLQVL	0.00822805
RIGR	0.00786797		ASHL	0.00818486
ADLR	0.00782772		OLQVR	0.00814252
SMDVL	0.00769677		AIZR	0.0080873
OLQDL	0.00748673		SMDDL	0.00805755
RIBL	0.00747536		OLQDL	0.00786575
RMDVL	0.00747117		AWBR	0.00763452
RMDL	0.00737326		IL2R	0.00762479
RMDDR	0.00736444		RIFR	0.00760217
URYDL	0.00733629		RMDVL	0.00756904
AQR	0.00732546		RIMR	0.00741852
AWCR	0.00728937		RIGR	0.00738387
AVKR	0.00724872		CEPDL	0.00724564
HSNR	0.00723264		SMDVL	0.00721128
SMBDL	0.00709459		AIYR	0.00707947
RIR	0.00704813		SMDVR	0.00698899
BAGR	0.00703975		AIML	0.00664439
DVC	0.00698781		RMDDR	0.00648244
ADEL	0.00696751		SAADL	0.00624006
SIADR	0.00693147		RMDVR	0.00622147
RIFL	0.00692741		RIML	0.00613994
SMDVR	0.00687149		IL1R	0.00593156
RMED	0.00686657		AIMR	0.00592755
IL2L	0.00667604		RIFL	0.00589788
URBR	0.00657386		RMDL	0.00580259
AIYR	0.00653104		CEPDR	0.00548321
ASHR	0.00650826		ASHR	0.00538052
SMDDR	0.00638715		SAAVR	0.00537112
RIFR	0.00605625		IL2DR	0.00524504
OLQDR	0.00605198		SAADR	0.00522597
ADLL	0.00600739		ALMR	0.00491158
SAAVL	0.00580663		URADR	0.00490197
ASEL	0.00576053		IL1L	0.00487842
CEPDR	0.00557498		SAAVL	0.00481456
AIMR	0.00554045		RIS	0.00479104
RMDDL	0.00551923		SIAVR	0.00466816
SAADR	0.00547559		RMDR	0.00459629
CEPDL	0.00527563		AIYL	0.00450048
AIAR	0.00521842		ADFR	0.00446996
URYVR	0.00505229		AUAL	0.00441804
URYVL	0.00499428		ASJL	0.00431936
RMER	0.00497911		AIAL	0.00429915
OLQVL	0.00495945		AWAL	0.00429022
IL2DR	0.00490074		AUAR	0.00424123
IL2DL	0.00486836		SIAVL	0.00423546
PVT	0.00486205		AVL	0.00419157
AVL	0.0048586		AFDR	0.00419049
RMDR	0.00480397		ADFL	0.00414071
ADFL	0.0046465		PVQR	0.00406558
IL1L	0.00455463		AIAR	0.00392276
PVNL	0.00454091		PVT	0.00391364
IL1R	0.00449468		ASKR	0.0036206
AWBL	0.00442381		URBL	0.00360972
SAADL	0.0043873		AWAR	0.00359259
AUAL	0.00434354		RMEL	0.00344754
AIAL	0.00428901		PVCL	0.00343975
ASJL	0.00420754		AVKR	0.00338599
ASHL	0.00414498		ASIL	0.00336848
OLQVR	0.00411606		URAVL	0.00330263
SDQR	0.0038939		IL1VL	0.00315876
PVCL	0.00387447		AWBL	0.00308637
AWBR	0.0038595		RID	0.00298595
PVNR	0.00385026		IL1VR	0.00296206
AVKL	0.00380001		IL2VL	0.00288452
ASKL	0.0037121		ALML	0.00267057
AUAR	0.00367336		ASIR	0.00263168
ASIL	0.00361424		RMER	0.00251717
URBL	0.0035582		AVKL	0.00240484
ADFR	0.00351769		URAVR	0.00238306
ASKR	0.00344054		ASJR	0.00231529
ASJR	0.003408		IL2VR	0.00226038
SMDDL	0.0033086		PVPR	0.0022562
BDUL	0.00328057		ASKL	0.00218101
ALML	0.00315555		URADL	0.00212997
SDQL	0.00299815		URBR	0.00210749
RMEL	0.00286195		PVPL	0.0019539
URADR	0.00285877		RIPR	0.00183948
BDUR	0.00255942		BDUL	0.00149398
ASIR	0.00245655		PVCR	0.0013167
PLNL	0.00244952		AFDL	0.00116331
AVM	0.00243562		BDUR	0.00106079
PVPR	0.00234277		PVQL	0.000811317
IL1VL	0.00225128		RIPL	0.000790007
IL1VR	0.00204641		ADEL	0.000389019
AWAR	0.00186988		FLPL	0.000351097
PVCR	0.00185918		ASGR	0.000238277
IL2VR	0.00175974		ASGL	0.000128817
IL2VL	0.0017501		FLPR	9.51305e-05
ALMR	0.00172358		ADER	0
PVPL	0.00164649		CANR	0
URADL	0.001646		CANL	0
FLPL	0.00160802		DB1	0
URAVR	0.00159756
PVQR	0.00147307
AWAL	0.00137859
PVQL	0.001364
URAVL	0.00131712
RIPR	0.0011666
AFDR	0.00113214
ALNL	0.00110078
AFDL	0.00108957
ASGR	0.000979324
RIPL	0.000921874
ASGL	0.000814468
ALNR	0.000651949
PLNR	0.00062853
CANR	0
SABVL	0
