# Supplementary material for: Differential adhesion regulates neurite placement via a retrograde zippering mechanism
Source: eLife. 2021 Nov 16;10:e71171. doi: 10.7554/eLife.71171 (PMC8843091; doi:10.7554/eLife.71171)
Supplement: Figure 4—source data 1. [file elife-71171-fig4-data1.xlsx]

## Sheet: Sheet1
Figure 4N
Number of animals with normal/mispositioned AIB distal neurite
Genotype	% animals with normal distal neurite placement	% animals with distal neurite mispositioned
WT	53	1
syg-1	9	29
syg-2	12	18
syg-1;syg-2	9	40
cell-specific syg-2 rescue	28	9
cell-specific syg-1 rescue	4	28
SYG-1 cosmid rescue	26	7
