# Supplementary material for: Differential adhesion regulates neurite placement via a retrograde zippering mechanism
Source: eLife. 2021 Nov 16;10:e71171. doi: 10.7554/eLife.71171 (PMC8843091; doi:10.7554/eLife.71171)
Supplement: Figure 5—figure supplement 4—source data 1. [file elife-71171-fig5-figsupp4-data1.xlsx]

## Sheet: Sheet1
Figure 5-figure supplement 4N
Number of animals with/without normal distal neurite placement upon RIM ablation
	% animals with normal distal neurite placement	% animals with distal neurite mispositioned
WT	31	1
RIM ablation strategy 1	6	25
RIM ablation strategy 2	16	17
