# Supplementary material for: Differential adhesion regulates neurite placement via a retrograde zippering mechanism
Source: eLife. 2021 Nov 16;10:e71171. doi: 10.7554/eLife.71171 (PMC8843091; doi:10.7554/eLife.71171)
Supplement: Figure 6—figure supplement 1—source data 1. [file elife-71171-fig6-figsupp1-data1.xlsx]

## Sheet: Sheet1
Figure 6-figure supplement 1C
Number of animals with/without posterior placement of distal neurite
Genotype	% animals with posterior placement of distal neurite	% animals without posterior placement of distal neurite
WT	0	32
syg-1(ky652)	2	24
posterior SYG-1; syg-1(ky652)	14	8
posterior SYG-1; syg-1(ky652); syg-2(ky671)	3	27
posterior SYG-1 endo; syg-1(ky652)	1	20
posterior SYG-1 ecto; syg-1(ky652)	5	12
posterior SYG-1; WT	15	25
