# Supplementary material for: Differential adhesion regulates neurite placement via a retrograde zippering mechanism
Source: eLife. 2021 Nov 16;10:e71171. doi: 10.7554/eLife.71171 (PMC8843091; doi:10.7554/eLife.71171)
Supplement: Figure 6—source data 1. [file elife-71171-fig6-data1.xlsx]

## Sheet: Sheet1
Figure 6K
Number of animals with/without posterior placement of distal neurite
Genotype	% animals with posterior placement of distal neurite	% animals without posterior placement of distal neurite
WT	0	32
syg-1	2	24
posterior SYG-1	12	7
posterior SYG-1	14	8
posterior SYG-1 in syg-2 mutant	3	27
