# Supplementary material for: Differential adhesion regulates neurite placement via a retrograde zippering mechanism
Source: eLife. 2021 Nov 16;10:e71171. doi: 10.7554/eLife.71171 (PMC8843091; doi:10.7554/eLife.71171)
Supplement: Figure 7—figure supplement 3—source data 1. [file elife-71171-fig7-figsupp3-data1.xlsx]

## Sheet: Sheet1
Figure 7-figure supplement 3N
Mean intensity (adhered), arbitrary units	Mean intensity (detached), arbitrary units
4302.6	987.135
2491.37	940.757
7901.21	2555.24
1103.28	1195.03
7807.25	1779.02
1677.59	55.144
3114.66	265.494
8342.67	777.457
7883.64	3329.99
2850.63	299.337
3436.23	1204.27
2303.18	37.528
3804.23	1229.4
